# Supplementary material
Source: PubMed Central journal article supplement (PMC7042862)
Supplement: jamainternmed-180-533-s003.pdf [file jamainternmed-180-533-s003.pdf]

## Data Sharing Statement

Timal. Effect of No Prehydration vs Sodium Bicarbonate Prehydration Prior to Contrast-Enhanced Computed Tomography in the Prevention of Postcontrast Acute Kidney Injury in Adults With Chronic Kidney Disease. *JAMA Intern Med*. Published February 17, 2020. 10.1001/jamainternmed.2019.7428

### Data

**Data available:** Yes

**Data types:** Other (please specify)

**Additional Information:** The data that support the findings of this study are available from the corresponding author on reasonable request.

**How to access data:** [m.v.huisman@lumc.nl](mailto:m.v.huisman@lumc.nl)

**When available:** With publication

### Supporting Documents

**Document types:** None

### Additional Information

**Who can access the data:** researchers

**Types of analyses:** meta analysis

**Mechanisms of data availability:** after approval of protocol

**Any additional restrictions:** na
